# Supplementary material for: Pt (111) quantum dot decorated flower-like αFe2O3 (104) thin film nanosheets as a highly efficient bifunctional electrocatalyst for overall water splitting
Source: Royal Society of Chemistry journal article supplement (doi:10.1039/c9ta01975h), 2019-01-01
Supplement: c9ta01975h1.pdf [file c9ta01975h1.pdf]

## Supporting Information

### **Pt (111) quantum dots decorated flower-like $\alpha\text{Fe}_2\text{O}_3$ (104) thin film nanosheets as highly efficient bifunctional electrocatalyst for overall water splitting**

Bo Ye,<sup>a</sup> Lirong Huang,<sup>a</sup> Yanping Hou,<sup>abc</sup> Ronghua Jiang,<sup>d</sup> Lei Sun,<sup>e</sup> Zebin Yu,<sup>\*a</sup> Boge Zhang,<sup>a</sup> Yiyi Huang<sup>a</sup> and Yalan Zhang<sup>a</sup>

- 
- a. School of Resources, Environment and Materials, Guangxi University, Nanning 530004, P.R. China. E-mail: xxzx7514@aliyun.com, xxzx7514@hotmail.com.*
- b. Guangxi Bossco Environmental Protection Technology Co., Ltd, 12 Kexin Road, Nanning 530007, P.R. China.*
- c. Guangxi Key Laboratory of Clean Pulp & Papermaking and Pollution Control, Nanning 530004, China*
- d. School of Chemical and Environmental Engineering, Shaoguan University, Guangdong 512005, P.R. China.*
- e. Institute of Tropical Agriculture and Forestry, Hainan University, Haikou 570228, China*

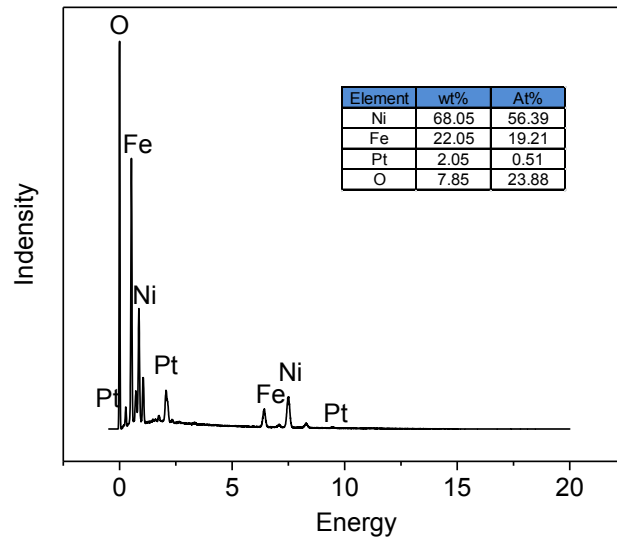

**Figure S1** EDS image of Pt- $\alpha$ Fe<sub>2</sub>O<sub>3</sub>/NF.

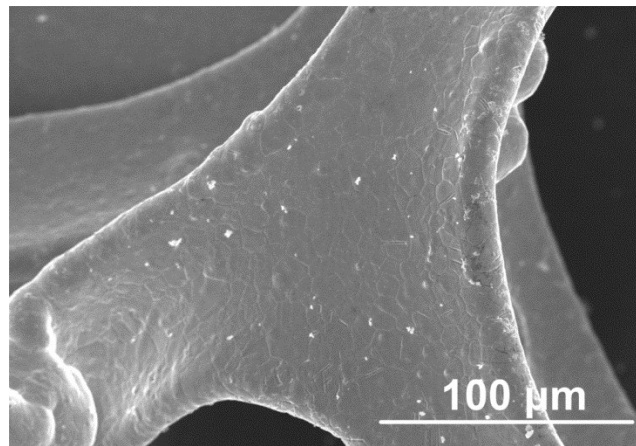

**Figure S2** FSEM images of Pt/NF.

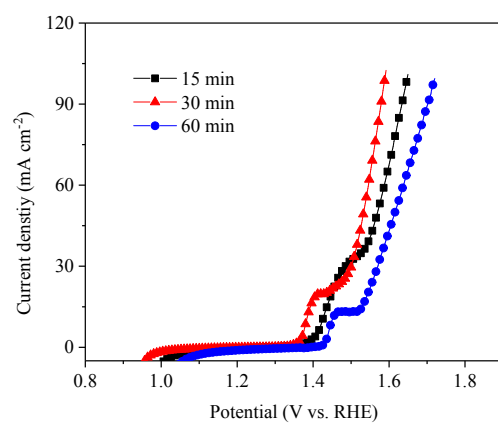

**Figure S3** OER electrocatalytic activity of Pt- $\alpha$ Fe<sub>2</sub>O<sub>3</sub>/NF obtained from different electrodeposition times.

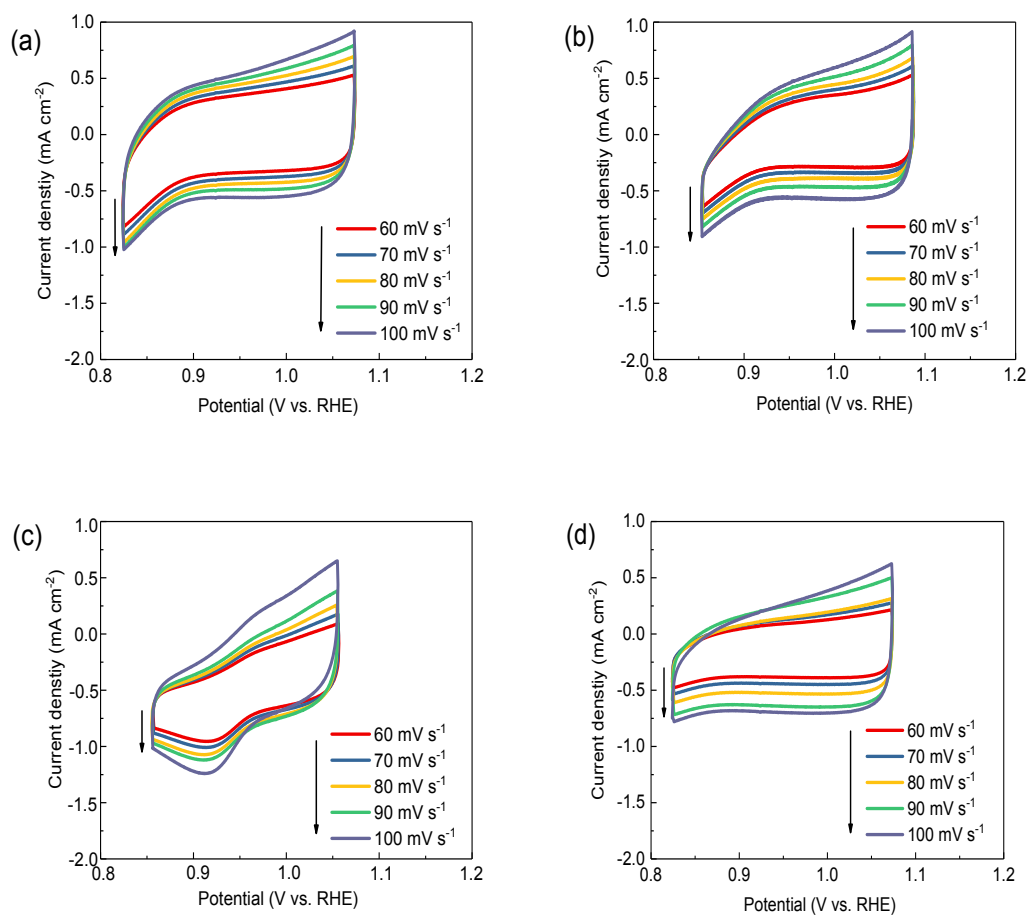

**Figure S4** CV of (a) Pt- $\alpha$ Fe<sub>2</sub>O<sub>3</sub>/NF, (b)  $\alpha$ Fe<sub>2</sub>O<sub>3</sub>/NF, (c) Pt/NF, (d) NF.

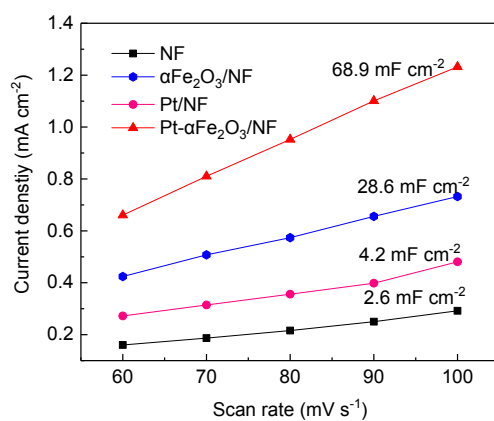

**Figure S5**  $C_{dl}$  of NF,  $\alpha\text{Fe}_2\text{O}_3/\text{NF}$ , Pt/NF and Pt- $\alpha\text{Fe}_2\text{O}_3/\text{NF}$ .

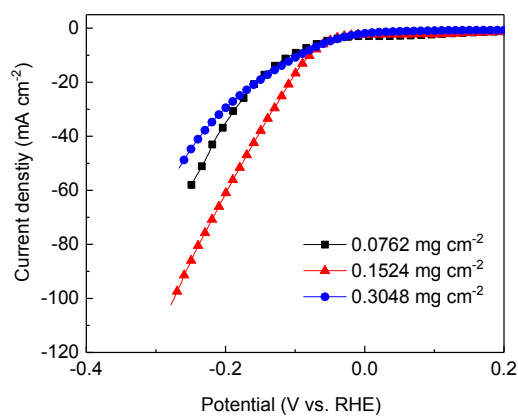

**Figure S6** HER electrocatalytic activity of Pt- $\alpha\text{Fe}_2\text{O}_3/\text{NF}$  with different amounts of Pt quantum dots loading.

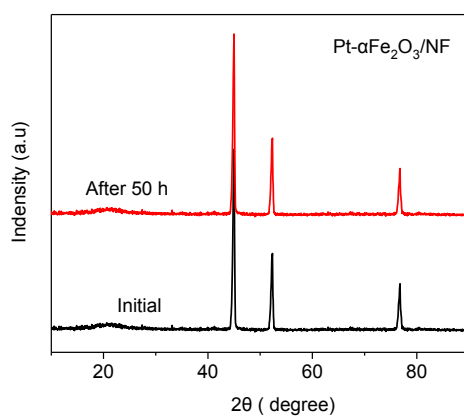

**Figure S7** XRD patterns of Pt- $\alpha\text{Fe}_2\text{O}_3/\text{NF}$  in initial and after working for 50h.

**Table S1** Comparison of theoretical Pt loading and experimental Pt loading on both Pt/NF and Pt- $\alpha$ Fe<sub>2</sub>O<sub>3</sub>/NF electrodes.

| Electrode                                       | Theoretical Pt loading<br>(mg cm <sup>-2</sup> ) | Experimental Pt loading<br>(mg cm <sup>-2</sup> ) |
|-------------------------------------------------|--------------------------------------------------|---------------------------------------------------|
| Pt/NF                                           | 0.1951                                           | 0.0503                                            |
| Pt- $\alpha$ Fe <sub>2</sub> O <sub>3</sub> /NF | 0.1951                                           | 0.1524                                            |

**Table S2** Fitting results of various resistances of oxygen evolution system with different electrodes.

|                                             | $R_s(\Omega)$ | $R_{ct}(\Omega)$ | $R_{int}(\Omega)$ |
|---------------------------------------------|---------------|------------------|-------------------|
| NF                                          | 0.92          | 25.17            | 26.09             |
| $\alpha\text{Fe}_2\text{O}_3/\text{NF}$     | 0.87          | 9.19             | 10.06             |
| Pt/NF                                       | 1.01          | 17.02            | 18.03             |
| Pt- $\alpha\text{Fe}_2\text{O}_3/\text{NF}$ | 0.87          | 7.14             | 8.01              |

**Table S3** Fitting results of various resistances of hydrogen evolution system with different electrodes.

|                                             | $R_s(\Omega)$ | $R_{ct}(\Omega)$ | $R_{int}(\Omega)$ |
|---------------------------------------------|---------------|------------------|-------------------|
| NF                                          | 1.08          | 16.06            | 17.14             |
| $\alpha\text{Fe}_2\text{O}_3/\text{NF}$     | 0.98          | 7.20             | 8.18              |
| Pt/NF                                       | 1.25          | 11.44            | 12.69             |
| Pt- $\alpha\text{Fe}_2\text{O}_3/\text{NF}$ | 0.80          | 0.81             | 1.61              |

**Table S4** Different materials and Pt- $\alpha$ Fe<sub>2</sub>O<sub>3</sub>/NF electrodes for OER, HER and overall water splitting.

| Catalyst                                          | Electrolyte                         | Overpotential (mV) for OER at a specific current density(mA cm <sup>-2</sup> ) | Overpotential (mV) for HER at a specific current density(mA cm <sup>-2</sup> ) | Overpotential (V) for overall water splitting at a specific current density(mA cm <sup>-2</sup> ) | Pt wt% (EDS) | Ref       |
|---------------------------------------------------|-------------------------------------|--------------------------------------------------------------------------------|--------------------------------------------------------------------------------|---------------------------------------------------------------------------------------------------|--------------|-----------|
| IrPt                                              | 0.5M H <sub>2</sub> SO <sub>4</sub> | 8@320                                                                          | -                                                                              | -                                                                                                 | 56           | 1         |
| Pt-Ni-Co                                          | 0.1M KOH                            | -                                                                              | 5 @22                                                                          | -                                                                                                 | 85.61        | 2         |
| Cu-Pt/NPCC                                        | 0.1M H <sub>2</sub> SO <sub>4</sub> | -                                                                              | 10@298                                                                         | -                                                                                                 | 16.92        | 3         |
| Pt-NiFe LDH-ht                                    | 1M KOH                              | 10@230                                                                         | 10@101                                                                         | 1.505                                                                                             | 1.51         | 4         |
| Pt- $\alpha$ Fe <sub>2</sub> O <sub>3</sub> /NF   | 1M KOH                              | 10@153                                                                         | 10@90                                                                          | 1.51                                                                                              | 2.05         | This work |
| Ti/IrO <sub>2</sub> -Ta <sub>2</sub> O            | 0.5M H <sub>2</sub> SO <sub>4</sub> | 12@170                                                                         | -                                                                              | -                                                                                                 | -            | 5         |
| NiSe/NF                                           | 1M KOH                              | 10@271                                                                         | 10@137                                                                         | 1.69                                                                                              | -            | 6         |
| CoFe/NF                                           | 1M KOH                              | 100@230                                                                        | 100@160                                                                        | 1.68                                                                                              | -            | 7         |
| CdS/Ni <sub>3</sub> S <sub>2</sub> /PNF           | 1M KOH                              | 100@400                                                                        | 10@121                                                                         | -                                                                                                 | -            | 8         |
| P-Co <sub>3</sub> O <sub>4</sub> /NF              | 1M KOH                              | 20@260                                                                         | 10@97                                                                          | 1.63                                                                                              | -            | 9         |
| Co <sub>3</sub> S <sub>4</sub> @MoS <sub>2</sub>  | 0.5M H <sub>2</sub> SO <sub>4</sub> | 10@330                                                                         | 10@210                                                                         | 1.58                                                                                              | -            | 10        |
| NiFe-oxide                                        | 1M KOH                              | 10@339                                                                         | 10@347                                                                         | 1.67                                                                                              | -            | 11        |
| MoWS <sub>2</sub> @Ni <sub>3</sub> S <sub>2</sub> | 1M KOH                              | 10@285                                                                         | 10@98                                                                          | 1.62                                                                                              | -            | 12        |
| FeCoO-NF                                          | 1M KOH                              | 10@224                                                                         | 10@205                                                                         | 1.62                                                                                              | -            | 13        |
| Fe-NiO/NF                                         | 1M KOH                              | 10@206                                                                         | 10@88                                                                          | 1.579                                                                                             | -            | 14        |

## References

1. M. Sung and J. Kim, *Int. J. Hydrogen Energy*, 2018, **43**, 2130-2138.
2. A. Oh, Y. J. Sa, H. Hwang, H. Baik, J. Kim, B. Kim, S. H. Joo and K. Lee, *Nanoscale*, 2016, **8**, 16379-16386.
3. S. Mandegarzad, J. B. Raoof, S. R. Hosseini and R. Ojani, *Electrochim. Acta*, 2016, **190**, 729-736.
4. S. Anantharaj, K. Karthick, M. Venkatesh, T. V. S. V. Simha, A. S. Salunke, L. Ma, H. Liang and S. Kundu, *Nano Energy*, 2017, **39**, 30-43.
5. B.-s. Li, A. Lin and F.-x. Gan, *Transactions of Nonferrous Metals Society of China*, 2006, **16**, 1193-1199.
6. H. Ren, Z.-H. Huang, Z. Yang, S. Tang, F. Kang and R. Lv, *J. Energy Chem.*, 2017, **26**, 1217-1222.
7. X. Zhao, X. Shang, Y. Quan, B. Dong, G.-Q. Han, X. Li, Y.-R. Liu, Q. Chen, Y.-M. Chai and C.-G. Liu, *Electrochim. Acta*, 2017, **230**, 151-159.
8. S. Qu, J. Huang, J. Yu, G. Chen, W. Hu, M. Yin, R. Zhang, S. Chu and C. Li, *ACS Appl. Mater. Interfaces*, 2017, **9**, 29660-29668.
9. Z. Wang, H. Liu, R. Ge, X. Ren, J. Ren, D. Yang, L. Zhang and X. Sun, *ACS Catal.*, 2018, **8**, 2236-2241.
10. Y. Guo, J. Tang, H. Qian, Z. Wang and Y. Yamauchi, *Chem. Mater.*, 2017, **29**, 5566-5573.
11. A. Kumar and S. Bhattacharyya, *ACS Appl. Mater. Interfaces*, 2017, **9**, 41906-41915.



12. M. Zheng, J. Du, B. Hou and C.-L. Xu, *ACS Appl. Mater. Interfaces*, 2017, **9**, 26066-26076.
13. H. A. Bandal, A. R. Jadhav, A. H. Tamboli and H. Kim, *Electrochim. Acta*, 2017, **249**, 253-262.
14. Z. Wu, Z. Zou, J. Huang and F. Gao, *J. Catal.*, 2018, **358**, 243-252.
